# Supplementary material
Source: PubMed Central journal article supplement (PMC5389365)

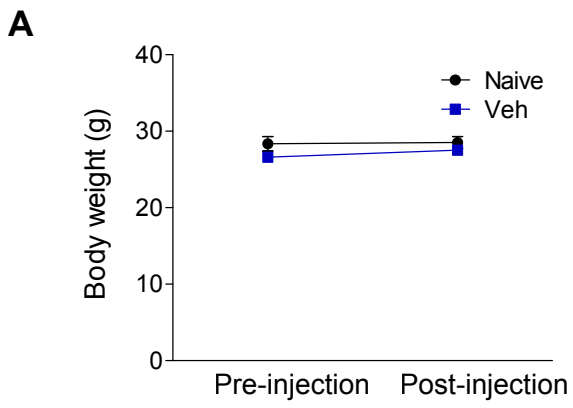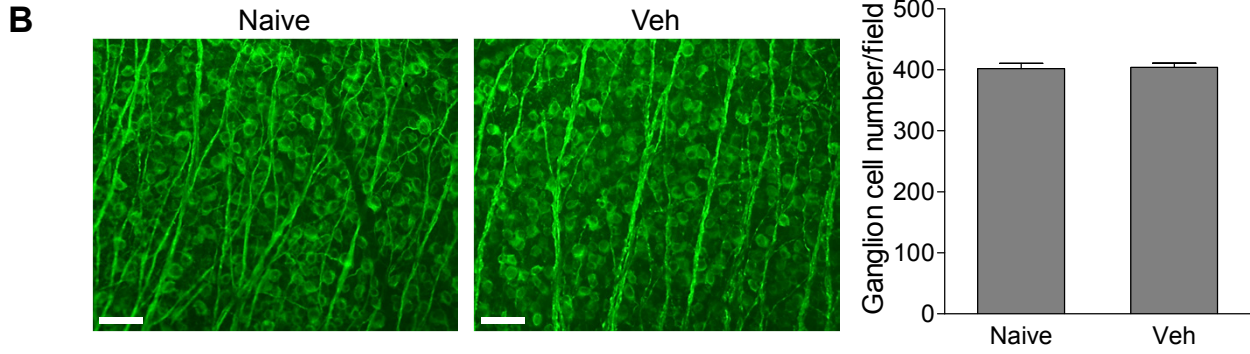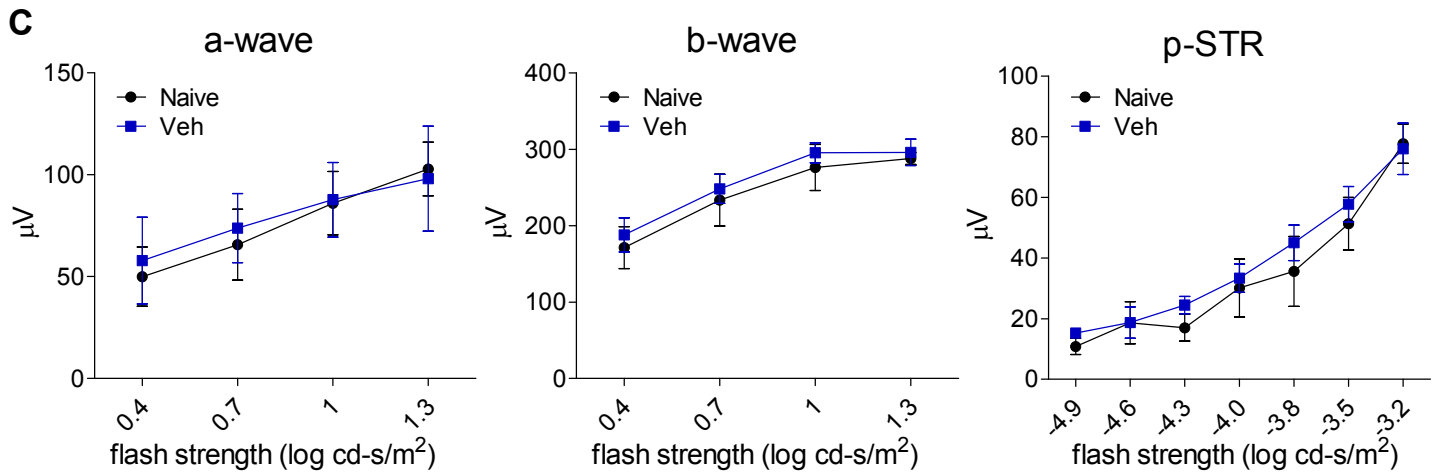

Supplement: mmc10.pdf [file mmc10.pdf]

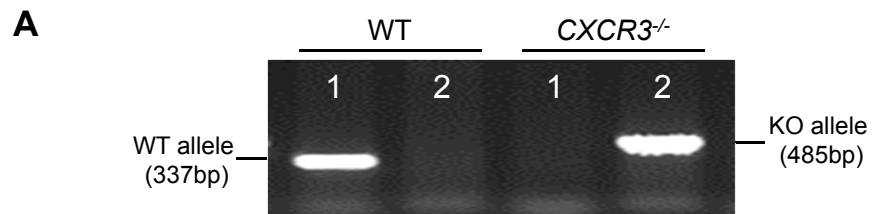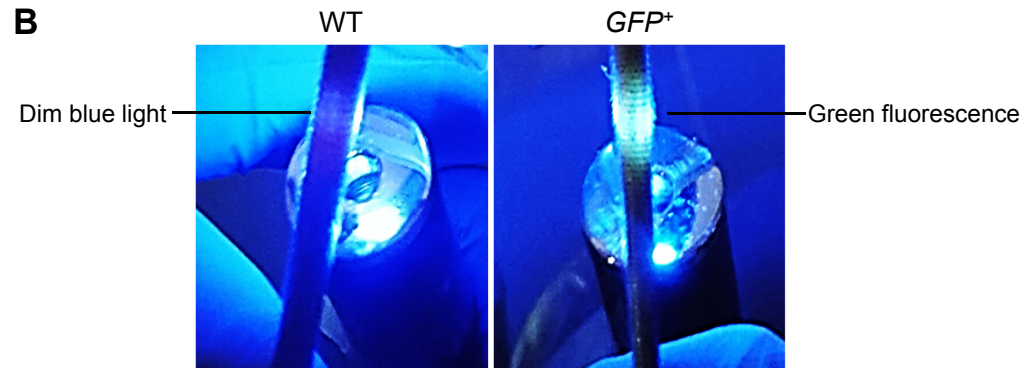

Supplement: mmc3.pdf [file mmc3.pdf]

Gated on CD45<sup>+</sup> cells

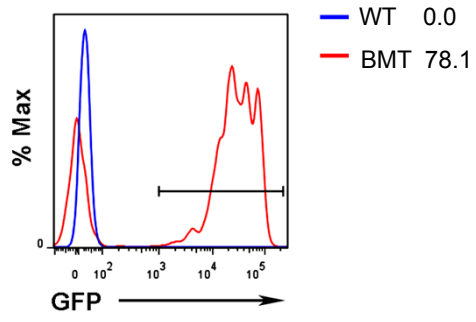

Supplement: mmc4.pdf [file mmc4.pdf]

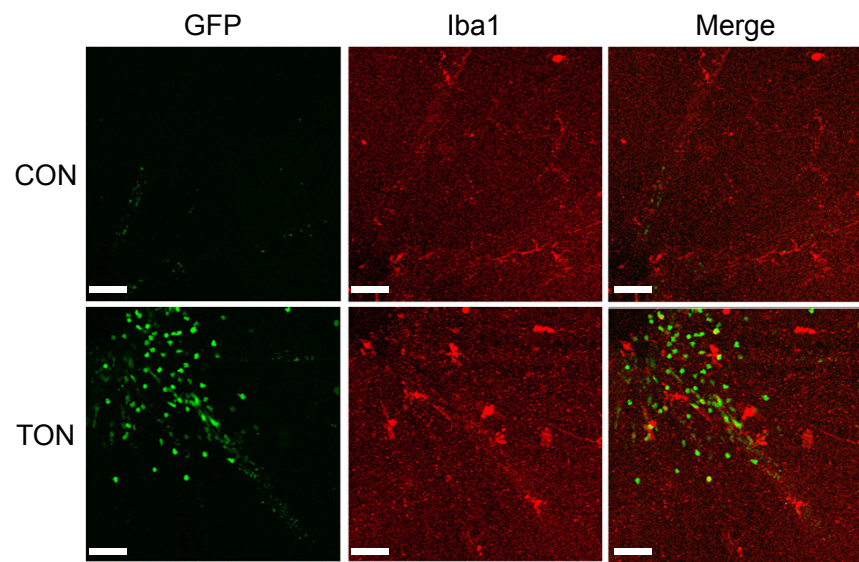

Supplement: mmc5.pdf [file mmc5.pdf]

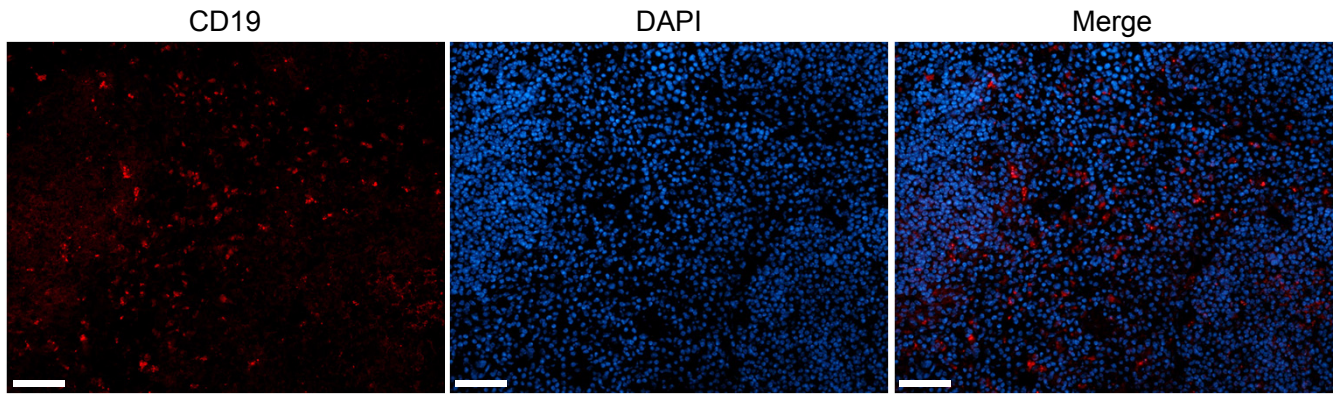

Supplement: mmc6.pdf [file mmc6.pdf]

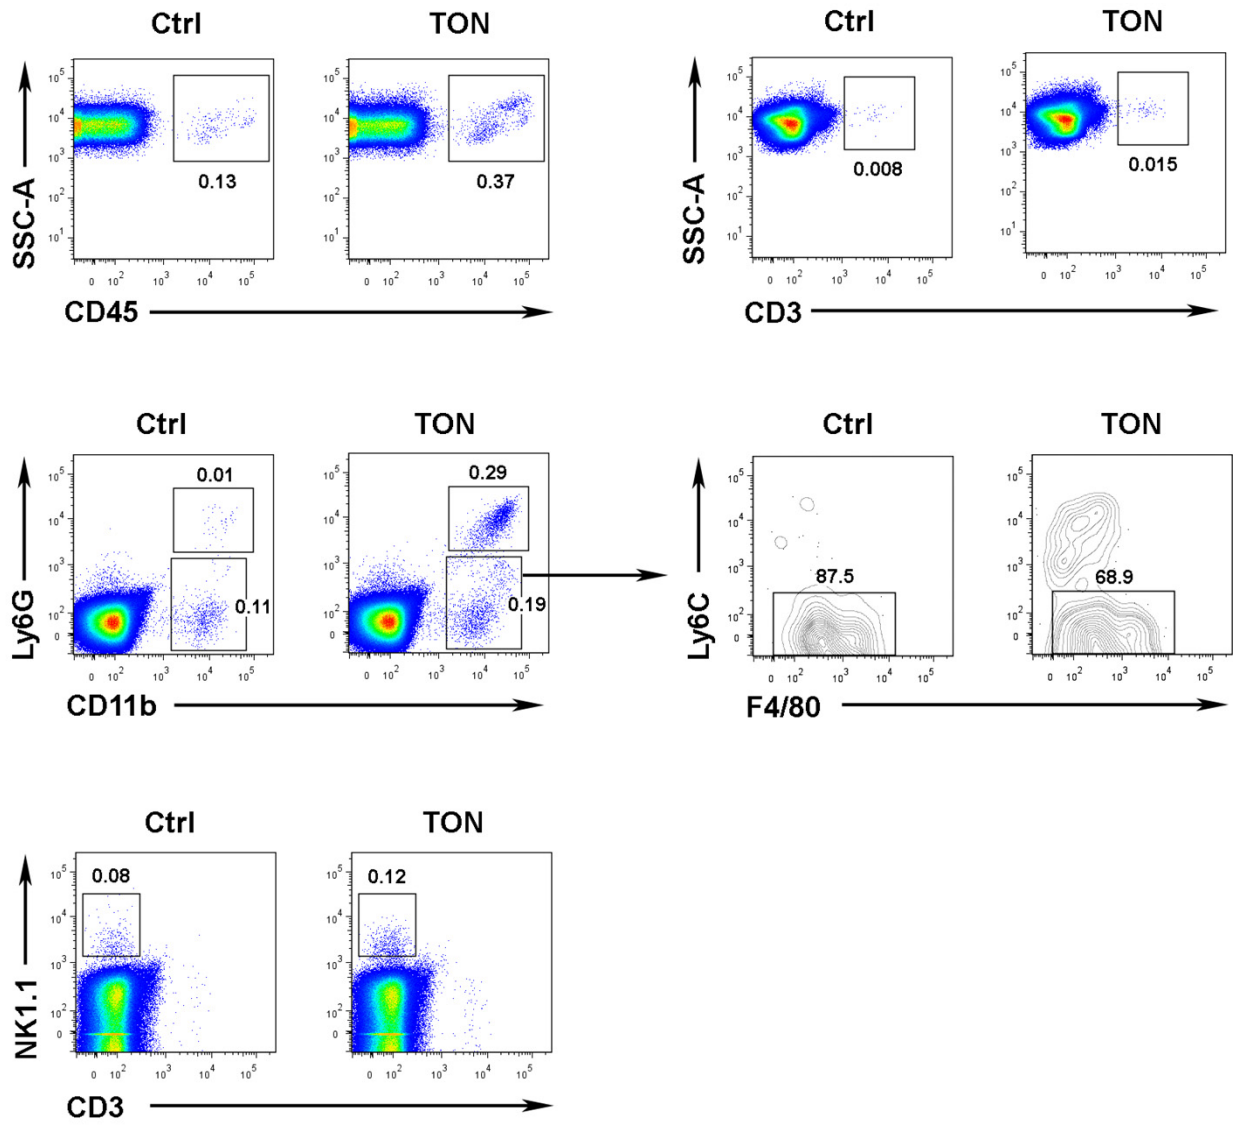

Supplemental Figure 5

Supplement: mmc7.pdf [file mmc7.pdf]

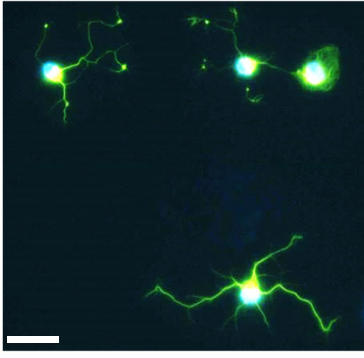

Supplement: mmc8.pdf [file mmc8.pdf]

**A**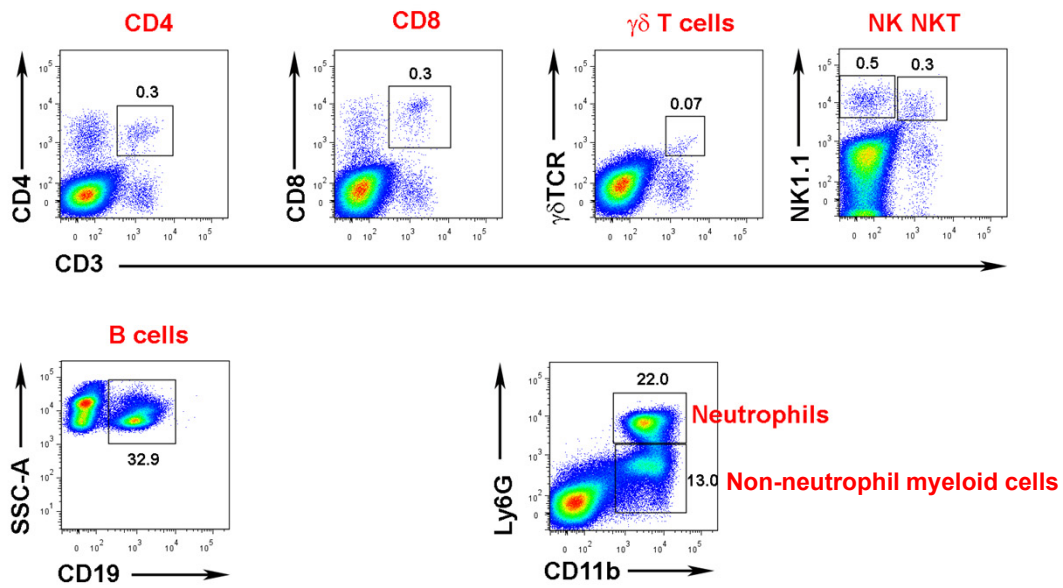**B**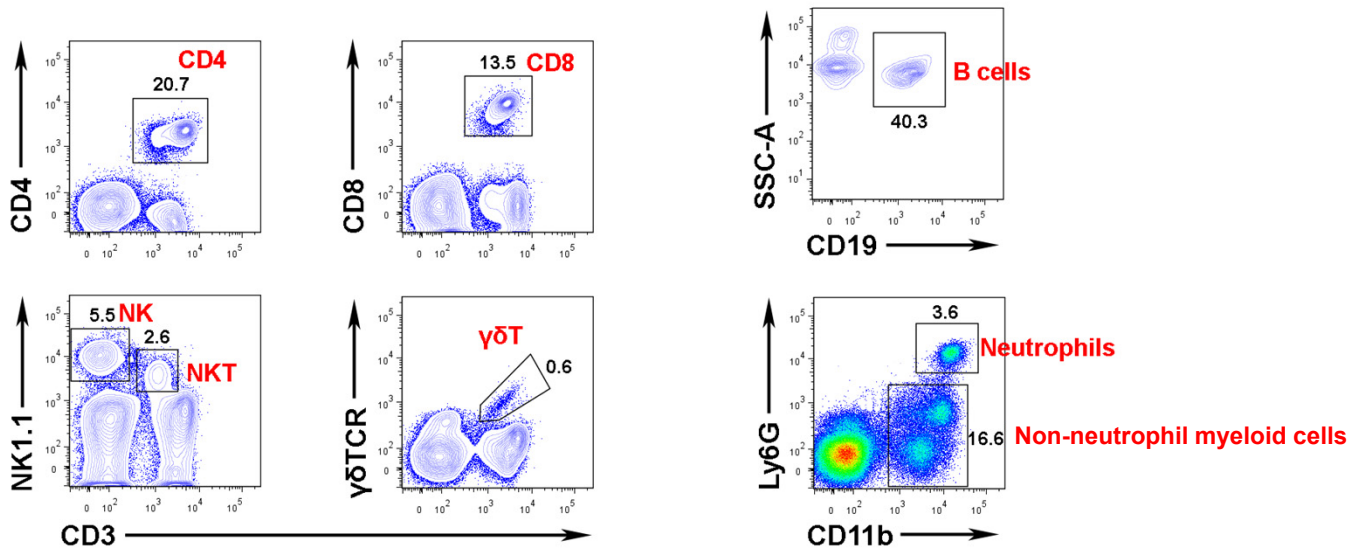

Supplement: mmc9.pdf [file mmc9.pdf]
